# Supplementary material for: Bee Venom Triggers Autophagy-Induced Apoptosis in Human Lung Cancer Cells via the mTOR Signaling Pathway
Source: Hindawi journal article supplement (doi:10.1155/2022/8916464), 2022-12-23
Supplement: f1 [file 8916464.f1.docx]

**Supplementary Material**

**Bee venom triggers autophagy-induced apoptosis in human lung cancer cells via mTOR signaling pathway**

**Ji Eun Yu1,*, Yuri Kim1,*, Da Eun Hong1, Dong Won Lee1, Ju Young Chang1, Seung Sik Yoo1, Min Ji Kim1, Dong Ju Son1, Jaesuk Yun1, Sang-Bae Han1, and Jin Tae Hong1,#**

1College of Pharmacy and Medical Research Center, Chungbuk National University,194-31, Osongsaengmyeong 1-ro, Osong-eup, Cheongju-si, Chungbuk 28160, Republic of Korea.

*: These authors contributed equally to this work.

**# *Corresponding author*:**

Dr. Jin Tae Hong

College of Pharmacy and Medical Research Center, Chungbuk National University

194-21 Osongsaengmyeong 1-ro, Osong-Biocampus, Osong-eup, Heungdeok-gu, Cheongju, Chungbuk 28160, Korea

Phone: +82-43-261-2813, FAX: +82-43-268-2732, E-mail: jinthong@chungbuk.ac.kr

**Supplementary Figure legend**

**
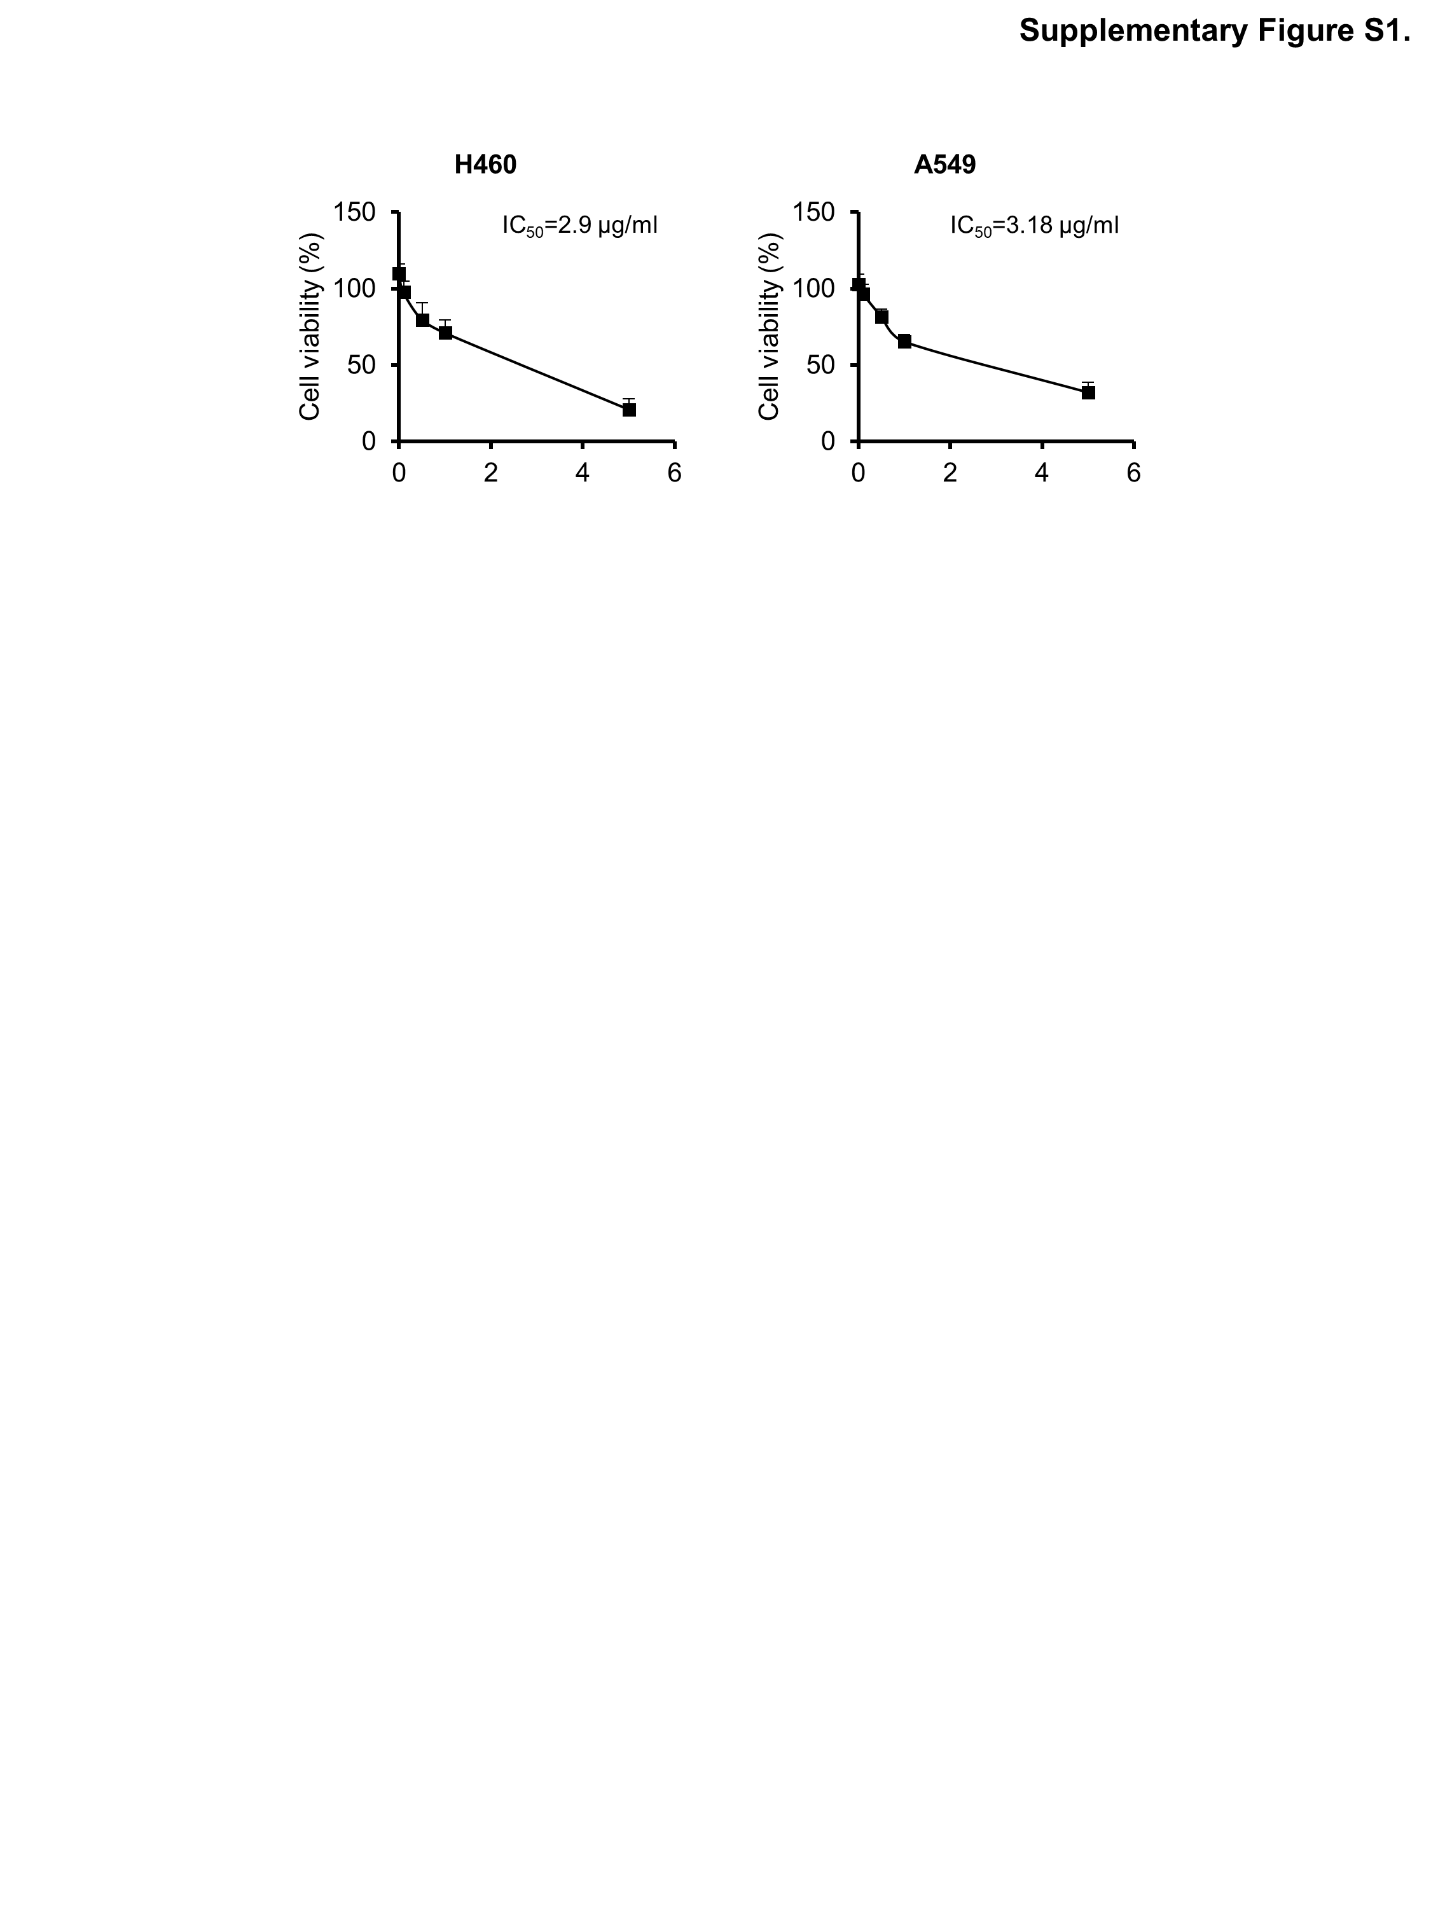
**

**Supplementary Figure S1.** Bee venom affects the viability of A549 and NCI-H460 cells.

NCI-H460 and A549 cells were treated with bee venom (0.1, 0.5, 1, and 5 μg/ml) for 24 h. Cell viability was measured using the MTT assay.


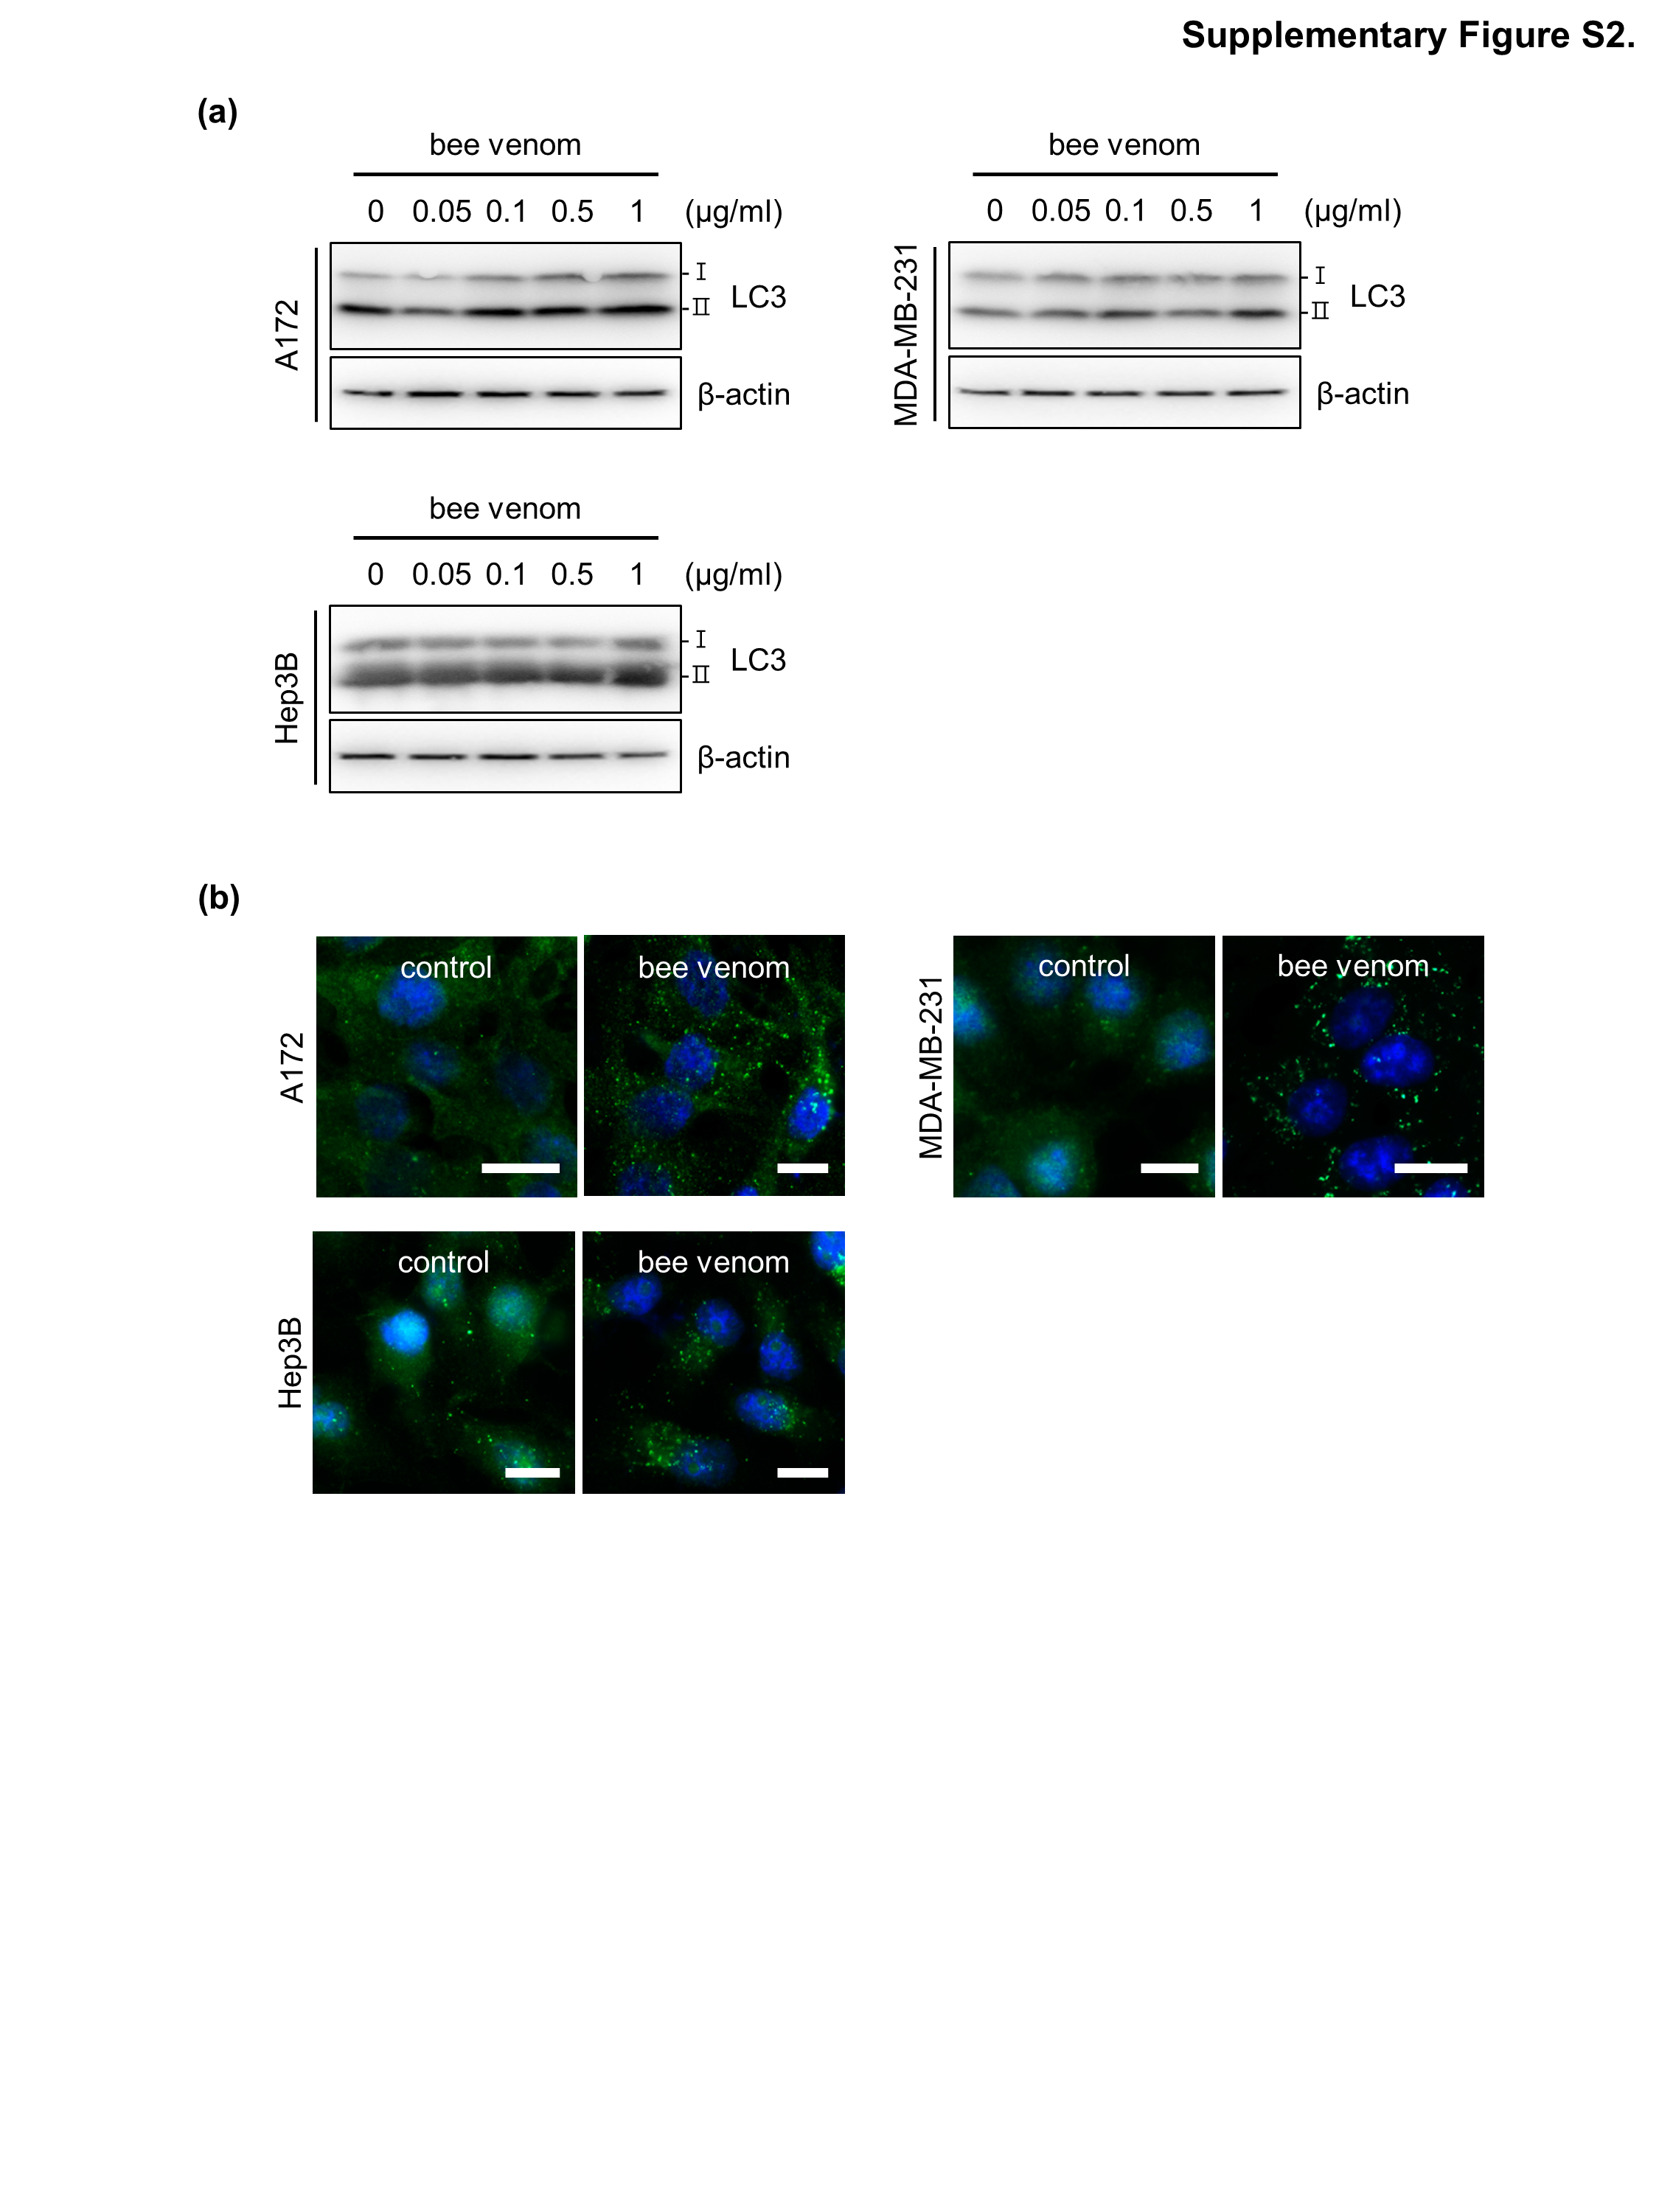


Supplementary Figure S2. Bee venom induces autophagy in various cancer cell lines.

(**a**) Cells were treated with bee venom (0.05, 0.1, 0.5, and 1 μg/ml) for 24 h. LC3 levels were evaluated by immunoblotting. (**b**) Cells were treated with 1 μg/ml bee venom for 24 h. The formation of LC3 puncta was detected after bee venom treatment under a fluorescence microscope. Scale bar, 10 μm. The percentage of cells along with the number of LC3 puncta was calculated.


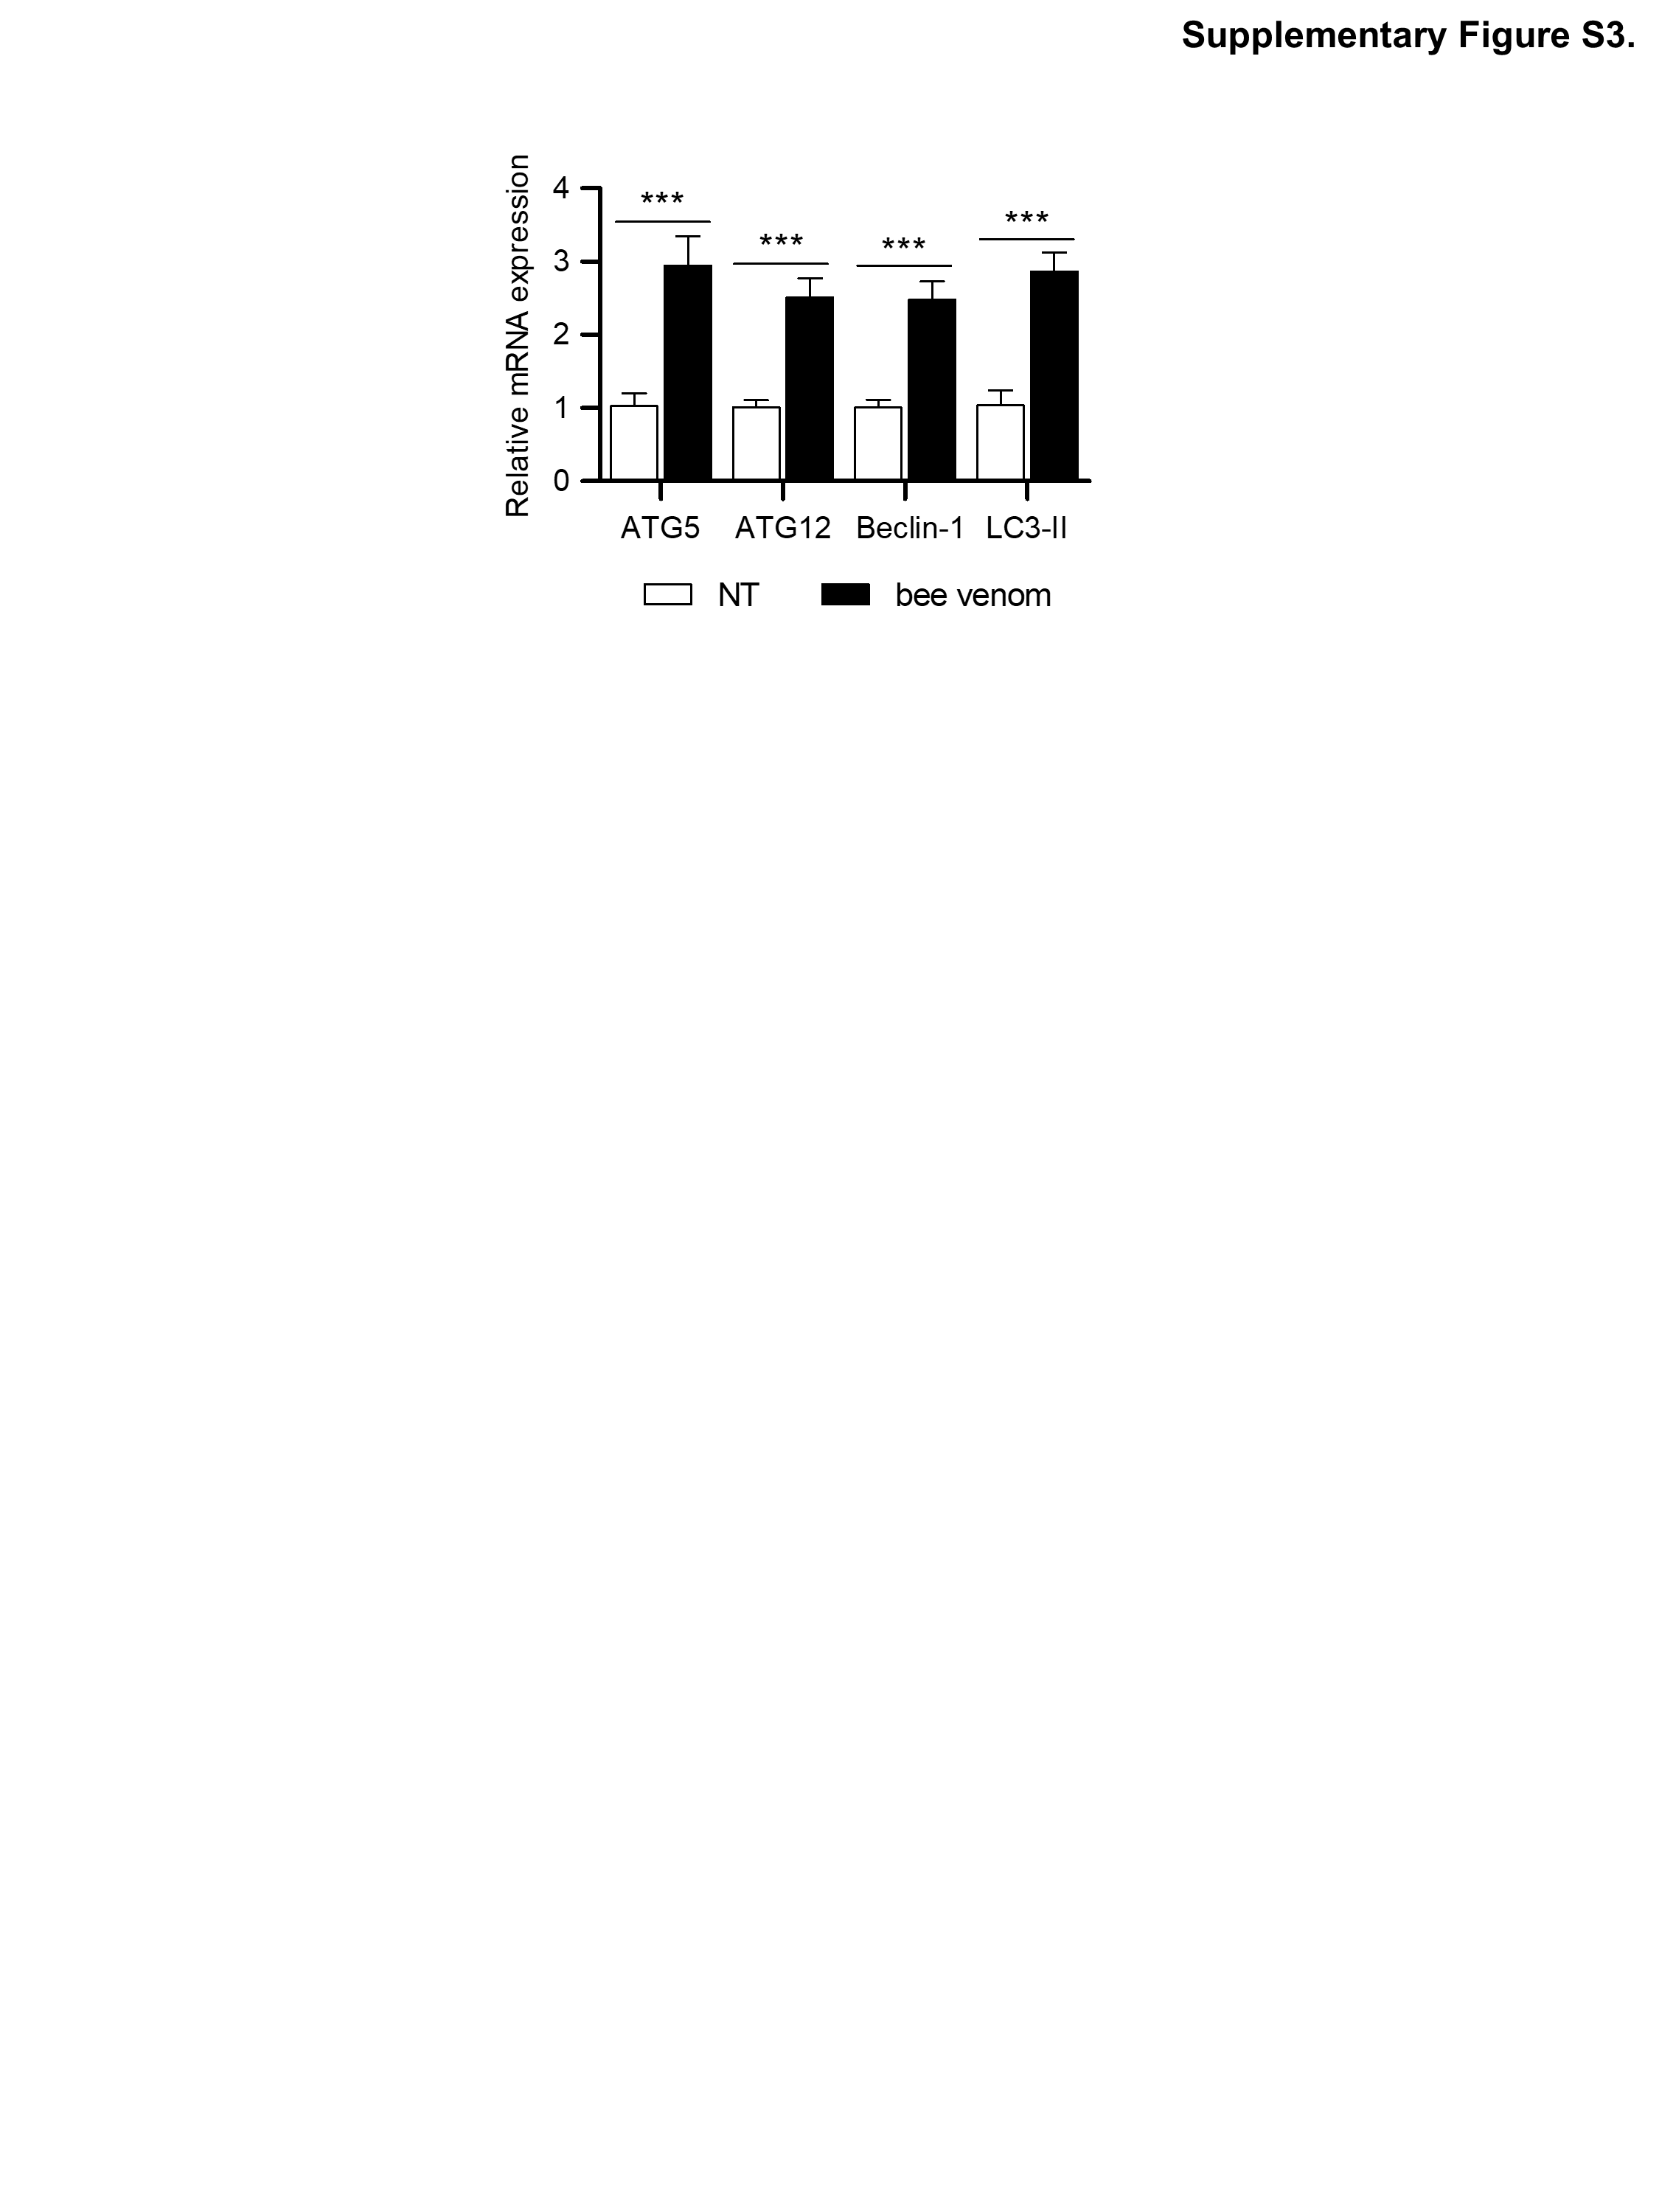


**Supplementary Figure S3.** The expression level of autophagy-related mRNA increases in bee venom-treated cells.

NCI-H460 cells were treated with 1 μg/ml bee venom for 24 h. The expression level of autophagy-related mRNA was measured using RT-qPCR.
